# Supplementary material for: Forkhead O Transcription Factor 4 Restricts HBV Covalently Closed Circular DNA Transcription and HBV Replication through Genetic Downregulation of Hepatocyte Nuclear Factor 4 Alpha and Epigenetic Suppression of Covalently Closed Circular DNA via Interacting with Promyelocytic Leukemia Protein
Source: PubMed Central journal article supplement (PMC9278149; doi:10.1128/jvi.00546-22), 2022-06-13
Supplement: jvi.00546-22-s0001.pdf [file jvi.00546-22-s0001.pdf]

1 **Forkhead O transcription factor 4 restricts HBV covalently closed circular DNA**  
2 **transcription and HBV replication through genetic downregulation of hepatocyte**  
3 **nuclear factor 4 alpha and epigenetic suppression of covalently closed circular**  
4 **DNA via interacting with promyelocytic leukemia protein**

5

6 Yuqi Li<sup>1#</sup>, Minjing He<sup>1#</sup>, Ruijie Gong<sup>1#</sup>, Ziteng Wang<sup>1</sup>, Lin Lu<sup>1</sup>, Shu Peng<sup>1</sup>, Zhiyun

7 Duan<sup>1</sup>, Ying Feng<sup>1</sup>, Yi Liu<sup>3\*</sup> and Bo Gao<sup>1,2\*</sup>

8

9 <sup>#</sup>These authors contribute equally to this work.

10

11 <sup>1</sup>From the Department of Immunology, School of Basic Medical Sciences, Shanghai

12 Medical College of Fudan University, Shanghai 200032, P.R. China

13

14 <sup>2</sup>Liver Cancer Institute, Zhongshan Hospital, Fudan University, Shanghai 200032, P.R.

15 China

16

17 <sup>3</sup>Department of Digestive Diseases, Huashan Hospital, Fudan University, Shanghai

18 200040, P.R. China

19

20 \*Corresponding authors: Bo Gao, E-mail: gaobofd@126.com; or Yi Liu, E-mail:

21 hsluiyi0205@163.com

22

23

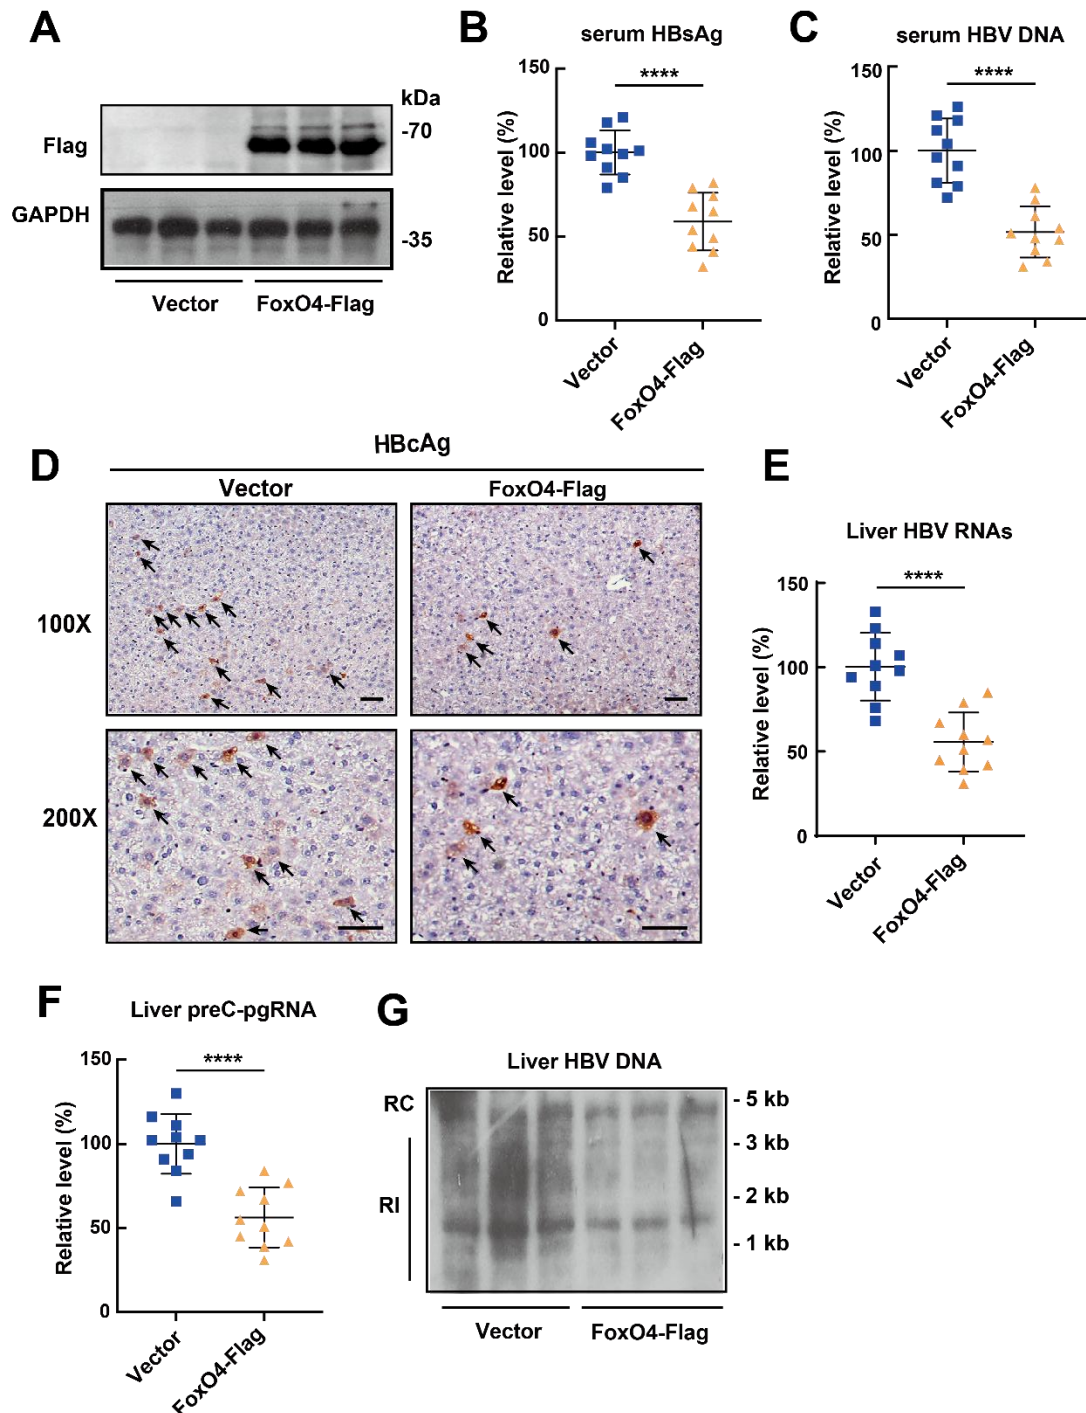

31 were collected. (A) The protein level of FoxO4-Flag in mice liver tissues was  
 32 determined by Western blotting using antibodies against Flag and GAPDH. (B, C)  
 33 The levels of HBsAg and HBV DNA in mice sera were determined by ELISA and  
 34 qPCR, respectively. (D) The level of HBcAg in the liver tissues of mice was analyzed  
 35 by immunohistochemical staining. (E, F) The levels of HBV RNAs and preC-pgRNA  
 36 in the liver tissues of mice were analyzed by qRT-PCR. (G) The level of HBV DNA  
 37 in the liver tissues of mice was determined by Southern blotting. Data are shown as  
 38 means  $\pm$  SD and are representative of three independent experiments. Scale bar: 100  
 39  $\mu$ m. \*\*\*\* $P < 0.0001$ . NS, no significance; RI, replicative intermediates.

40

41 **Supporting FIG. S2**

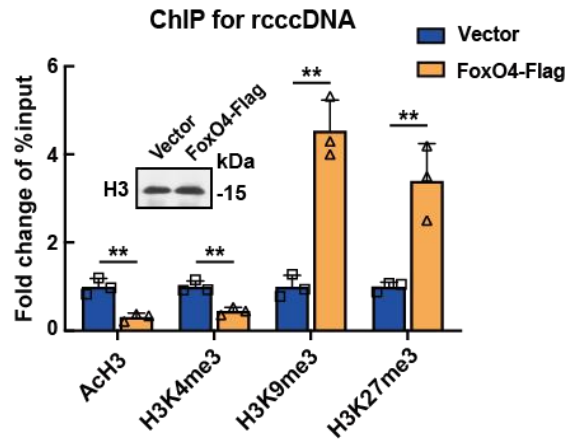

42

43 **Supporting FIG. S2.** FoxO4 displays epigenetic suppressive activity on rcccDNA *in*  
 44  *vivo*. Mice were injected with prcccDNA/Cre and FoxO4-Flag or vector using HGT  
 45 technique ( $n = 5$ ). 4 days post-injection, mice liver tissues were collected. The effect  
 46 of FoxO4 on the recruitment of Ach3, H3K4me3, H3K9me3, and H3K27me3 onto  
 47 rcccDNA in mice liver tissues was determined by ChIP assays. Data are shown as fold  
 48 change to control empty vector-transfected cells after normalized to input and control  
 49 IgG. The value obtained from control siRNA-transfected and IRF-1-untreated mice  
 50 was set to 1. Data are shown as means  $\pm$  SD and are representative of three  
 51 independent experiments. \*\* $P < 0.01$ .

52

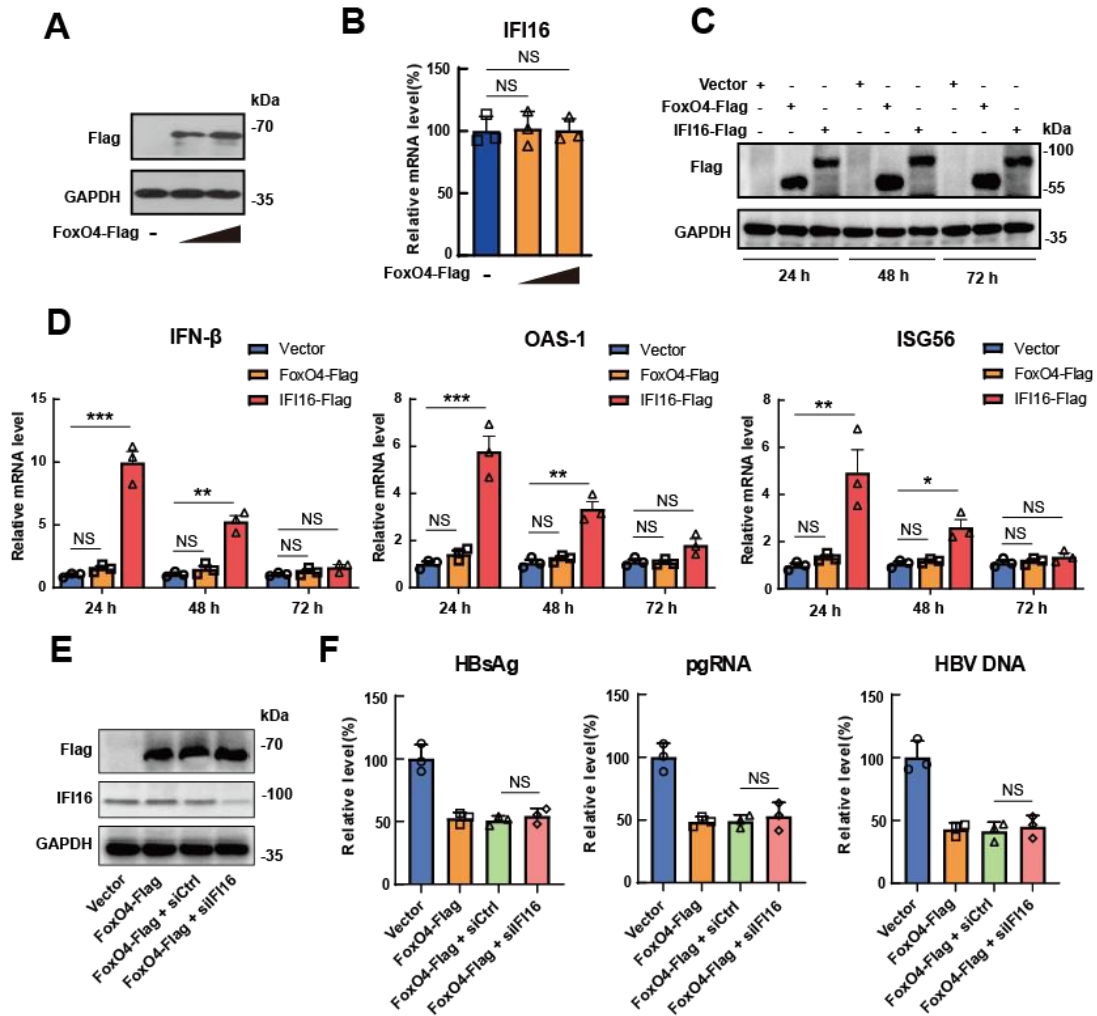

55

56 **Supporting FIG. S3.** The role of IFI16 in FoxO4-mediated anti-cccDNA activity. **A**,57 **B**: FoxO4-Flag was transfected into Huh7 cells for 48 h, and the protein level of

58 exogenous FoxO4-Flag was determined by Western blotting (A), and the mRNA level

59 of IFI16 was determined by qRT-PCR (B). **C**, **D**: Empty control vector, FoxO4-Flag

60 or IFI16-Flag was transfected into Huh7 cells together with prcccDNA/Cre for

61 different time points (24, 48, 72 hours). The exogenously-expressed FoxO4-Flag and

62 IFI16-Flag were detected by Western blotting (C), and the mRNA levels of IFN-β,

63 OAS1 and ISG56 (D) were examined by qRT-PCR for the indicated time points. **E**, **F**:

64 Huh7 cells were transfected with IFI16 siRNA for 48 h, and the cells were further

65 transfected with FoxO4-Flag for another 48 h. The expression level of exogenous

66 FoxO4 was determined by Western blotting (E), and the HBV proteins, HBV

67 transcripts and HBV DNA was examined by ELISA, qRT-PCR and qPCR,



84 are shown as means  $\pm$  SD and are representative of three independent experiments.  
85 **\*\*P** < 0.01. NS, no significance. The differences within and between groups were  
86 compared by Student's t-test and two-way analysis of variance (ANOVA),  
87 respectively.

88

89

90 **Supporting FIG. S5**

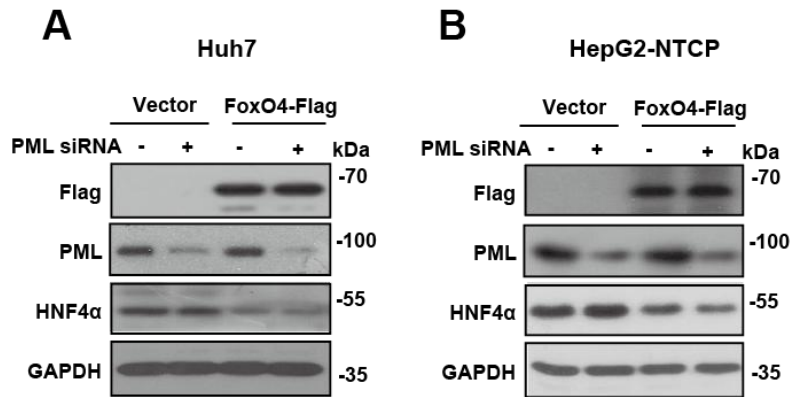

91

92 **Supporting FIG. S5. PML do not affect the expression of HNF4α in the absence**  
93 **or presence of FoxO4.** Huh7 cells (A) or HepG2-NTCP cells (B) were transfected  
94 with control or PML siRNA. 48 hours later, cells were further transfected with  
95 FoxO4-Flag or control empty vector for another 48 hours. The expression levels of  
96 FoxO4-Flag, PML and HNF4α were determined by Western blotting.

97

98 **Supporting FIG. S6.**

99

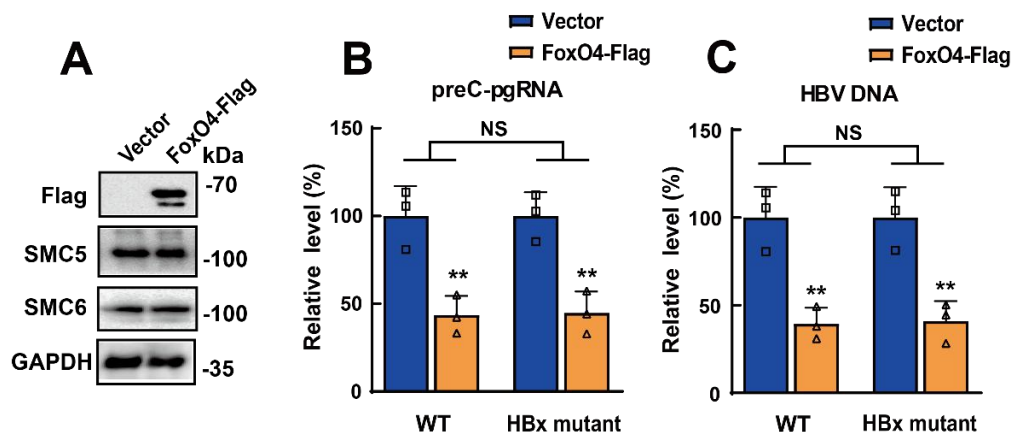

100

101 **Supporting FIG. S6. FoxO4 fails to upregulate the expression level of SMC5 and**

102 **SMC6 and inhibits the rcccDNA-driven transcription and HBV replication**

103 **independent of HBx. A:** FoxO4-Flag or control empty vector was transfected into

104 Huh7 cells together with prcccDNA/Cre plasmids. 24 hours posttransfection, the

105 protein level of FoxO4, SMC5 and SMC6 were examined by Western blot. **B, C:**

106 FoxO4-Flag was transfected into Huh7 cells together with prcccDNA/Cre (WT) or

107 prcccDNA with the HBx mutated/Cre (HBx mutant). 48 hours posttransfection, levels

108 of preC-pgRNA (B) and HBV DNA (C) were determined by qRT-PCR and qPCR,

109 respectively. Data are shown as means  $\pm$  SD of triplicates and are representative of

110 three independent experiments. \*\* $P < 0.01$ . NS, no significance.

111

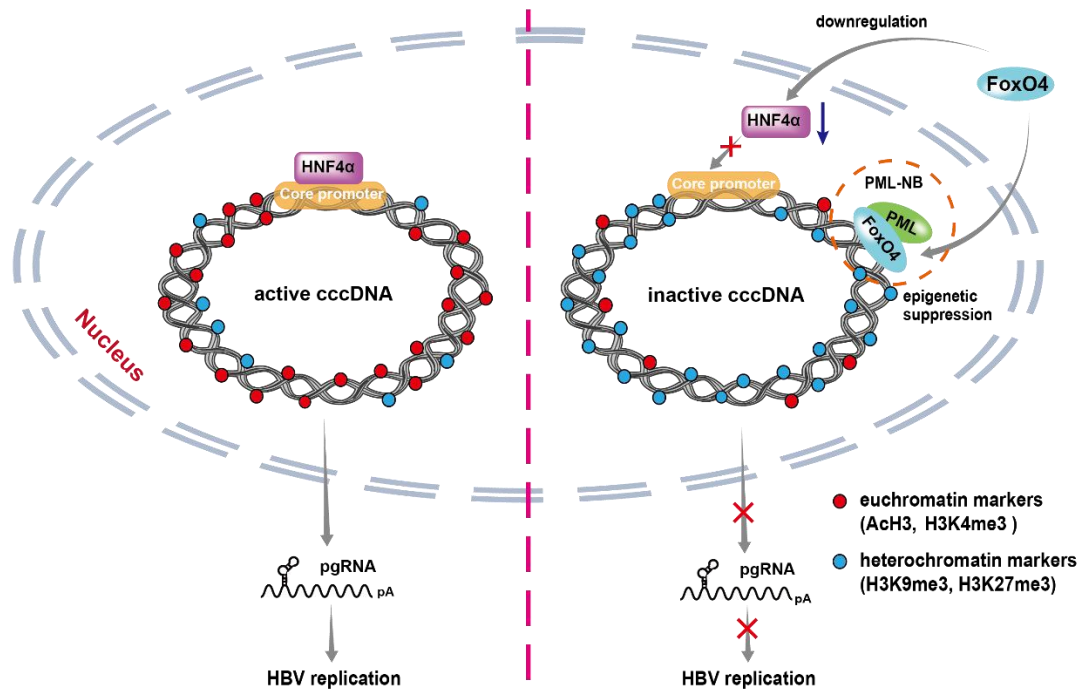

112

113 **Supporting FIG. S7. Graphical illustration of FoxO4-mediated inhibitory effect**  
 114 **on HBV cccDNA.** FoxO4 displays inhibitory effect on cccDNA-driven transcription  
 115 and HBV replication, but it does not affect the level of cccDNA itself. Mechanistically,  
 116 FoxO4 expression could lead to the epigenetic suppression of cccDNA through  
 117 co-localizing with PML in the nuclear bodies and interacting with PML.  
 118 Downregulation of PML significantly attenuates FoxO4-mediated epigenetic  
 119 suppression of cccDNA and the following cccDNA transcription and HBV production.  
 120 On the other hand, FoxO4 expression leads to the downregulation of HNF4 $\alpha$ .  
 121 However, HNF4 $\alpha$  appears not to be involved in FoxO4-mediated epigenetic  
 122 suppression of cccDNA, although it contributes indeed to FoxO4 inhibition of HBV  
 123 core promoter activity. Together, FoxO4 might inhibit cccDNA transcription and HBV  
 124 replication via a two-part mechanism: one is epigenetic suppression of cccDNA via  
 125 interacting with PML, the other is inhibition of HBV core promoter activity involving  
 126 the genetic downregulation of HNF4 $\alpha$ .

127

128



129 **Supplemental Table 1: Primers/siRNA oligos**

|                 |            |                               |
|-----------------|------------|-------------------------------|
| HBV RNAs        | Forward    | 5'-GCACTTCGCTTCACCTCTGC-3'    |
|                 | Reverse    | 5'-CTCAAGGTCGGTCGTTGACA-3'    |
| preC-pgRNA      | Forward    | 5'-TGTTCAAGCCTCCAAGCT-3'      |
|                 | Reverse    | 5'-GGAAAGAAGTCAGAAGGCAA-3'    |
| HBV DNA         | Forward    | 5'-CCCGTTTGTCTCTAATTCC-3'     |
|                 | Reverse    | 5'-GTCCGAAGGTTTGGTACAGC-3'    |
| HBV cccDNA      | Forward    | 5'-CTCCCCGTCTGTGCCTTCT-3'     |
|                 | Reverse    | 5'-GCCCCAAAGCCACCCAAG-3'      |
| HBV rcccDNA     | Forward    | 5'-CAAGACAGGTTTAAGGAGAC-3'    |
|                 | Reverse    | 5'-GAGAGAAAGGCAAAGTGGAT-3'    |
| $\beta$ -globin | Forward    | 5'-GTGCACCTGACTCCTGAGGAGA-3'  |
|                 | Reverse    | 5'-CCTTGATACCAACCTGCCAG-3'    |
| GAPDH           | Forward    | 5'-GCCTCTGCGCCCTTGAGCTA-3'    |
|                 | Reverse    | 5'-GATGCGGCCGTCTCTGGAAC-3'    |
| IFN- $\beta$    | Forward    | 5'-GACCAACAAGTGTCTCCTCCAAA-3' |
|                 | Reverse    | 5'-GAACTGCTGCAGCTGCTTAATC-3'  |
| OAS1            | Forward    | 5'-TCCACCTGCTTCACAGAACTACA-3' |
|                 | Reverse    | 5'-TGGGCTGTGTTGAAATGTGTTT-3'  |
| ISG56           | Forward    | 5'-GCCTTGCTGAAGTGTGGAGGAA-3'  |
|                 | Reverse    | 5'-ATCCAGGCGATAGGCAGAGATC-3'  |
| FoxO4 siRNA#1   | Sense      | 5'-CGCGAUCAUAGACCUAGAUTT-3'   |
|                 | Anti-sense | 5'-AUCUAGGUCUAUGAUCGCGTT-3'   |
| FoxO4 siRNA#2   | Sense      | 5'-GUGACAUGGAUAACAUCAUTT-3'   |
|                 | Anti-sense | 5'-AUGAUGUUAUCCAUGUCACTT-3'   |
| PML siRNA       | Sense      | 5'-AGAUGCAGCUGUAUCCAAG-3'     |
|                 | Anti-sense | 5'-CUUGGAUACAGCUGCAUCU-3'     |

130

131

132 **Supplemental Table 2: Antibodies**

|               |                                   |
|---------------|-----------------------------------|
| Anti-Flag     | Bioworld Biotechnology, AP0007    |
| GAPDH         | Cell Signaling Technology, #8884  |
| FoxO4         | Cell Signaling Technology, #9472  |
| HBcAg         | Abcam, ab8639                     |
| H3            | Santa Cruz, sc-8654               |
| Ach3          | Cell Signaling Technology, #9677  |
| H3K4me3       | Cell Signaling Technology, #9727  |
| H3K9me3       | Cell Signaling Technology, #5327  |
| H3K27me3      | Cell Signaling Technology, #9733  |
| Anti-HA       | Bioworld Biotechnology, AP0005    |
| PML           | Cell Signaling Technology, #33156 |
| p53           | Cell Signaling Technology, #2524  |
| HNF4 $\alpha$ | Bioworld Biotechnology, BS6888    |
| SMC5          | Abcam, ab154103                   |
| SMC6          | Abcam, ab155495                   |

**Supplemental Table S3 Characteristics of CHB patients and Control individuals**

|                         | No. | Age<br>(yr) | Gender | HBsAg | Serum<br>HBV-DNA<br>(IU/mL) | Serum<br>AST<br>(IU/L) | Serum<br>ALT<br>(IU/L) |                                | No. | Age<br>(yr) | Gender | HBsAg | Serum<br>HBV-DNA<br>(IU/mL) | Serum<br>AST<br>(IU/L) | Serum<br>ALT<br>(IU/L) |
|-------------------------|-----|-------------|--------|-------|-----------------------------|------------------------|------------------------|--------------------------------|-----|-------------|--------|-------|-----------------------------|------------------------|------------------------|
| <b>CHB<br/>patients</b> | 1   | 38          | M      | +     | 1.91E+05                    | 46                     | 49                     | <b>Control<br/>individuals</b> | 1   | 38          | M      | —     | —                           | 26                     | 29                     |
|                         | 2   | 21          | M      | +     | 3.30E+03                    | 25                     | 38                     |                                | 2   | 45          | F      | —     | —                           | 12                     | 21                     |
|                         | 3   | 36          | M      | +     | 7.09E+07                    | 60                     | 87                     |                                | 3   | 51          | M      | —     | —                           | 32                     | 70                     |
|                         | 4   | 46          | M      | +     | 1.69E+03                    | 18                     | 27                     |                                | 4   | 39          | M      | —     | —                           | 23                     | 25                     |
|                         | 5   | 32          | F      | +     | 6.76E+05                    | 48                     | 103                    |                                | 5   | 52          | M      | —     | —                           | 17                     | 21                     |
|                         | 6   | 58          | F      | +     | 4.18E+03                    | 24                     | 23                     |                                | 6   | 37          | M      | —     | —                           | 15                     | 11                     |
|                         | 7   | 35          | M      | +     | 1.91E+04                    | 39                     | 108                    |                                | 7   | 46          | F      | —     | —                           | 17                     | 25                     |
|                         | 8   | 23          | F      | +     | 3.68E+06                    | 18                     | 17                     |                                | 8   | 24          | F      | —     | —                           | 26                     | 35                     |
|                         | 9   | 52          | M      | +     | 1.07E+05                    | 30                     | 60                     |                                | 9   | 61          | M      | —     | —                           | 11                     | 19                     |
|                         | 10  | 39          | M      | +     | 9.87E+03                    | 29                     | 82                     |                                | 10  | 38          | M      | —     | —                           | 32                     | 39                     |
|                         | 11  | 54          | M      | +     | 8.76E+02                    | 23                     | 23                     |                                | 11  | 31          | M      | —     | —                           | 21                     | 28                     |
|                         | 12  | 53          | M      | +     | 1.01E+03                    | 29                     | 30                     |                                | 12  | 45          | F      | —     | —                           | 33                     | 29                     |
|                         | 13  | 45          | F      | +     | 1.01E+03                    | 18                     | 22                     |                                | 13  | 27          | M      | —     | —                           | 23                     | 23                     |
|                         | 14  | 37          | F      | +     | 5.56E+05                    | 51                     | 57                     |                                | 14  | 34          | M      | —     | —                           | 26                     | 40                     |
|                         | 15  | 36          | M      | +     | 4.48E+01                    | 60                     | 87                     |                                | 15  | 37          | F      | —     | —                           | 36                     | 42                     |
|                         | 16  | 44          | M      | +     | 9.09E+04                    | 34                     | 27                     |                                | 16  | 39          | M      | —     | —                           | 20                     | 28                     |
|                         | 17  | 37          | F      | +     | 6.68E+05                    | 31                     | 34                     |                                | 17  | 41          | F      | —     | —                           | 30                     | 38                     |
|                         | 18  | 39          | M      | +     | 5.68E+08                    | 42                     | 48                     |                                | 18  | 29          | M      | —     | —                           | 19                     | 25                     |
